# Supplementary material for: Family Functioning, Maternal Depression, and Adolescent Cognitive Flexibility and Its Associations with Adolescent Depression: A Cross-Sectional Study
Source: MDPI journal article supplement (doi:10.3390/children11010131), 2024-01-22
Supplement: s1 [file s1]

**Table S1.** Research methods used in the study.

| VARIABLES                          | METHODS                           |          |
|------------------------------------|-----------------------------------|----------|
|                                    | adolescent                        | mother   |
| Adolescent' depression             | BDI-II; CDI-2                     | CDI-2    |
| Mother' depression                 | -                                 | BDI-II   |
| Family functioning                 | FACES IV                          | FACES IV |
| Adolescents' cognitive flexibility | Brixton Spatial Anticipation Test | -        |

**Table S2.** Differences between teenagers with a major depressive disorder and their healthy peers

|                       | Depressed adolescents (n=63) | Healthy controls (n=46) | V    | p             |
|-----------------------|------------------------------|-------------------------|------|---------------|
| Postpartum depression | 23 (36,50%)                  | 6 (13,04%)              | 7.43 | <b>0.0064</b> |
| Divorce               | 14 (22,22%)                  | 8 (17,39%)              | 0.38 | 0.05367       |
| Alcohol abuse         | 18 (28,57%)                  | 10 (21,74%)             | 0.64 | 0.04222       |

**Table S3.** Other aspects of family functioning

| Family functioning                      | Depressed adolescents (n=63) |                                    |           | Healthy controls (n=46)            |                  |       | intergroup difference | p             |
|-----------------------------------------|------------------------------|------------------------------------|-----------|------------------------------------|------------------|-------|-----------------------|---------------|
|                                         | A - Adolescent<br>M - Mother | mean $\pm$ SD/<br>median $\pm$ IQR | min.-max. | mean $\pm$ SD/<br>median $\pm$ IQR | min.-max.        |       |                       |               |
| Balanced Cohesion raw score A (1-35)    | Me $\pm$ IQR                 | 23 $\pm$ 7                         | 8-34      | Me $\pm$ IQR                       | 27 $\pm$ 6       | 16-35 | $z=-3.6081$           | <b>0.0003</b> |
| Balanced Cohesion raw score M (1-35)    | Me $\pm$ IQR                 | 28 $\pm$ 7                         | 7-35      | Me $\pm$ IQR                       | 28 $\pm$ 4       | 23-34 | $z=-0.7389$           | 0.4599        |
| Balanced Flexibility raw score A (1-35) | Me $\pm$ IQR                 | 20 $\pm$ 7                         | 10-32     | Me $\pm$ IQR                       | 24 $\pm$ 6       | 16-34 | $z=-3.8149$           | <b>0.0001</b> |
| Balanced Flexibility raw score M (1-35) | Me $\pm$ IQR                 | 23 $\pm$ 8                         | 10-33     | Me $\pm$ IQR                       | 24 $\pm$ 5       | 21-33 | $z=-3.0029$           | <b>0.0026</b> |
| Disengaged raw score A (1-50)           | $\bar{x}\pm$ SD.43           | 19.10 $\pm$ 7                      | 7-35      | $\bar{x}\pm$ SD                    | 15.57 $\pm$ 4.43 | 7-26  | $t=-2.17049$          | <b>0.0299</b> |
| Disengaged raw score M (1-50)           | $\bar{x}\pm$ SD              | 15.25 $\pm$ 6.00                   | 7-31      | $\bar{x}\pm$ SD                    | 13.52 $\pm$ 3.31 | 9-22  | $t=1.01893$           | 0.3082        |
| Enmeshed raw score A (1-35)             | Me $\pm$ IQR                 | 15 $\pm$ 6                         | 9-30      | Me $\pm$ IQR                       | 14.50 $\pm$ 6    | 8-23  | $z=-0.28629$          | 0.7746        |
| Enmeshed raw score M (1-35)             | Me $\pm$ IQR                 | 14 $\pm$ 7                         | 7-32      | Me $\pm$ IQR                       | 14 $\pm$ 5       | 10-20 | $z=-0.3725$           | 0.7094        |
| Rigid raw score A (1-35)                | $\bar{x}\pm$ SD              | 17.78 $\pm$ 4.67                   | 7-27      | $\bar{x}\pm$ SD                    | 17.78 $\pm$ 4.29 | 9-25  | $t=-0.1908$           | 0.8486        |
| Rigid raw score M (1-35)                | Me $\pm$ IQR                 | 17 $\pm$ 8                         | 8-30      | Me $\pm$ IQR                       | 17 $\pm$ 7       | 1-26  | $z=-0.88293$          | 0.3772        |
| Chaotic raw score A (1-35)              | Me $\pm$ IQR                 | 17 $\pm$ 8                         | 9-32      | Me $\pm$ IQR                       | 16.50 $\pm$ 6    | 8-29  | $z=-1.33434$          | 0.1820        |
| Chaotic raw score M (1-35)              | Me $\pm$ IQR                 | 15 $\pm$ 9                         | 7-31      | Me $\pm$ IQR                       | 15.50 $\pm$ 6    | 7-26  | $z=-0.22757$          | 0.8199        |

**Table S4.** Correlation analysis between the results of family functioning in the assessment of a teenager (A) and a mother (M).

| A - Adolescent<br>M - mother    | CDI-<br>2 | General Family<br>Functioning A | Cohesion A    | Flexibility A | Satisfaction<br>A | Communicat<br>ion A | Balanced<br>cohesion A | Balanced<br>Flexibility A | Disengaged<br>A | Enmeshed A    | Rigid A      | Chaotic A |
|---------------------------------|-----------|---------------------------------|---------------|---------------|-------------------|---------------------|------------------------|---------------------------|-----------------|---------------|--------------|-----------|
| CDI-2                           |           | -0.21                           | -0.21         | -0.19         | -0.18             | -0.07               | -0.25                  | -0.18                     | 0.08            | 0.01          | 0.00         | 0.06      |
| BDI-II mother                   | 0.08      | -0.05                           | -0.08         | 0.00          | 0.08              | 0.08                | 0.00                   | 0.09                      | 0.08            | 0.19          | 0.19         | 0.08      |
| General Family<br>Functioning M | -<br>0.23 | <b>0.27*</b>                    | <b>0.32*</b>  | 0.20          | 0.13              | 0.19                | <b>0.30*</b>           | 0.23                      | -0.17           | <b>-0.39*</b> | 0.00         | -0.08     |
| Cohesion M                      | -<br>0.19 | 0.19                            | 0.25*         | 0.10          | 0.19              | 0.19                | 0.22                   | 0.14                      | -0.21           | <b>-0.34*</b> | 0.05         | -0.05     |
| Flexibility M                   | -<br>0.22 | <b>0.32*</b>                    | <b>0.30*</b>  | <b>0.29*</b>  | 0.08              | 0.16                | <b>0.33*</b>           | <b>0.29*</b>              | -0.08           | <b>-0.32*</b> | -0.05        | -0.10     |
| Satisfaction M                  | -<br>0.18 | -0.02                           | 0.04          | <b>-0.07</b>  | <b>0.30*</b>      | <b>0.28*</b>        | 0.00                   | -0.04                     | -0.19           | -0.07         | 0.08         | 0.05      |
| Communication<br>M              | -<br>0.19 | -0.13                           | -0.07         | -0.15         | 0.24              | 0.11                | -0.11                  | -0.16                     | -0.05           | -0.11         | -0.05        | 0.06      |
| Balanced<br>Cohesion M          | -<br>0.20 | 0.09                            | 0.12          | 0.05          | 0.00              | 0.01                | 0.16                   | 0.14                      | -0.06           | -0.16         | 0.15         | -0.05     |
| Balanced<br>Flexibility M       | -<br>0.20 | <b>0.29*</b>                    | <b>0.31*</b>  | 0.22          | 0.08              | 0.15                | <b>0.29*</b>           | <b>0.25*</b>              | -0.15           | <b>-0.29*</b> | 0.04         | -0.09     |
| Disengaged M                    | 0.17      | -0.23                           | <b>-0.37*</b> | -0.07         | <b>-0.40*</b>     | <b>-0.36*</b>       | -0.24                  | -0.13                     | <b>0.45*</b>    | <b>0.27*</b>  | -0.08        | -0.02     |
| Enmeshed M                      | 0.00      | -0.20                           | -0.16         | -0.21         | -0.10             | -0.08               | -0.16                  | -0.04                     | 0.09            | <b>0.38*</b>  | 0.34         | 0.16      |
| Rigid M                         | -<br>0.18 | -0.09                           | 0.00          | -0.18         | -0.04             | -0.03               | -0.04                  | -0.02                     | -0.13           | 0.08          | <b>0.44*</b> | -0.10     |
| Chaotic M                       | 0.29      | -0.17                           | -0.15         | <b>-0.26*</b> | 0.00              | -0.07               | -0.16                  | -0.23                     | 0.04            | 0.18          | -0.05        | 0.20      |

\*p&lt;0.005

BDI-II (The Beck Depression Inventory-II)

CDI-2 (The Children's Depression Inventory 2)
